# Supplementary material for: Seven membered rings via intramolecular Pauson–Khand reactionsElectronic supplementary data (ESI) available: spectroscopic and analytical characterization of compounds 5–8 and 10. See http://www.rsc.org/suppdata/cc/b1/b108134a/
Source: Royal Society of Chemistry journal article supplement (doi:10.1039/b108134a), 2001-11-14
Supplement: b108134a.doc [file b108134a.doc]

# Experimental Section

# General:

# Melting points were taken on a Büchi 530 apparatus and are uncorrected. 1H NMR and 13C NMR spectra were recorded on a Brucker AM-300 instrument at 300 and 75.43 MHz respectively. NMR spectra were registered in CDCl3 and chemical shifts are given in ppm relative to TMS (1H, 0.00 ppm) or CDCl3 (13C, 77.00 ppm). IR spectra were recorded on a Perkin-Elmer 1330 infrared spectrophotometer. For purification of crude reaction mixtures flash chromatography was applied in all cases. Merck silica-gel (230-400 mesh) was used as the stationary phase. TMANO (trimethylamine *N*-oxide) was dehydrated by refluxing overnight a toluene solution using a Dean-Stark apparatous. 4Å Molecular sieves, (beads, 8-12 mesh, Aldrich) were powdered by vigorous stirring in toluene overnight. After filtration, the powder was dried in an oven for 4 h at 120ºC.

# General procedure for the Pauson-Khand reaction.

# Method A: 1.00 mmol of the enyne 1 was dissolved in dry toluene (40 mL) at room temperature under argon, in a flask containing eight times the mass of the enyne of powdered 4Å molecular sieves. To this solution, 1.20 mmol of Co2(CO)8 were added and the resulting mixture was stirred for 2 h until total complexation of the enyne (t.l.c.). The reaction was then cooled to -10ºC with an ice/salt bath, and a suspension of Me3NO (9.00 mmol) in toluene at 0ºC was added dropwise. After 18 h of stirring, the mixture was filtrated, the solvent was evaporated under vacuum and the crude was purified and/or separated by flash chromatography (hexane/EtOAc mixtures).

# Method B: 1.00 mmol of the enyne 1 was dissolved in dry toluene (40 mL) at room temperature under argon, in a flask containing eight times the mass of the enyne of powdered 4Å molecular sieves. To this solution, 1.20 mmol of Co2(CO)8 were added and the resulting mixture was stirred for 2 h until total complexation of the enyne (t.l.c.). The reaction was refluxed for 18 h. After filtration and solvent elimination the crude was purified and/or separated by flash chromatography (hexane/EtOAc mixtures).

# Method C: 1.00 mmol of the enyne 1 was dissolved in dry toluene (40 mL) at room temperature under argon. To this solution, 1.20 mmol of Co2(CO)8 were added and the resulting mixture was stirred for 2 h until total complexation of the enyne (t.l.c.). The reaction was refluxed for 18 h. After filtration and solvent elimination the crude was purified and/or separated by flash chromatography (hexane/EtOAc mixtures).

# Preparation of 5. Following Method A, from 0.2 g (0.89 mmol) of 1, 0.36 g (1.07 mmol) of Co2(CO)8, 1.6 g of molecular sieves and 0.60 g (8.01 mmol) of TMANO, 0.04 g (20%) of 5 was obtained as a pale yellow oil, and following Method B, from 0.25 g (1.11 mmol) of 1, 0.46 g (1.33 mmol) of Co2(CO)8 and 2.0 g of molecular sieves, 0.02 g (10%) of 5 was obtained.

# 1H NMR CDCl3  1.60 (t, 1H, J= 13.7. Hz), 2.08 (dd, 1H, J1= 19.2 Hz, J2= 2.2 Hz), 2.65-2.74 (m, 1H), 2.77 (dd, 1H, J1= 19.2 Hz, J2= 6.6 Hz), 3.64-3.72 (m, 1H), 5.02 (d, 1H, J= 13.7 Hz), 5.26-5.30 (m, 2H), 6.11(s, 1H), 6.43 (s, 1H); 7.11 (t, 1H, J= 7.7 Hz), 7.27 (t, 1H, J= 8.2 Hz), 7.38 (d, 1H, J= 8.8 Hz), 7.57 (d, 1H, J= 7.7 Hz) 13C NMR  CDCl3 208.0, 174.6, 141.0, 136.9, 132.0, 127.0, 122.5, 121.0, 119.9, 108.6, 101.9, 66.4, 44.4, 42.9, 39.7, 38.3; IR (neat)  3250, 2940, 1720 cm-1.

# Preparation of 6. Following Method A, from 0.2 g (0.59 mmol) of 2, 0.24 g (0.71 mmol) of Co2(CO)8, 1.6 g of molecular sieves and 0.40 g (5.31 mmol) of TMANO, 0.14 g (65%) of 6 was obtained as a pale yellow oil, following Method B, from 0.2 g (0.59 mmol) of 2, 0.24 g (0.71 mmol) of Co2(CO)8 and 1.6 g of molecular sieves, 0.16 g (75%) of 6 was obtained and, following Method C, from 0.2 g (0.59 mmol) of 2 and 0.24 g (0.71 mmol) of Co2(CO)8, 0.09 g (40%) of 6 was obtained.

# 1H NMR CDCl3  -0.13 (s, 3H), 0.15 (s, 3H), 0.90 (s, 9H), 1.56 (dd, 1H, J1= 13.2. Hz, J2= 12.6 Hz), 2.08 (dd, 1H, J1= 19.2 Hz, J2= 2.2 Hz), 2.55-2.63 (m, 1H), 2.77 (dd, 1H, J1= 19.2 Hz, J2= 6.6 Hz), 3.62-3.71 (m, 1H), 4.98 (d, 1H, J= 13.5 Hz), 5.21 (d, 1H, J= 6.0 Hz); 5.27 (d, 1H, J= 13.5 Hz), 6.10 (s, 1H), 6.36 (s, 1H), 7.10 (t, 1H, J= 7.7 Hz), 7.25 (t, 1H, J= 8.2 Hz), 7.38 (d, 1H, J= 8.2 Hz), 7.57 (d, 1H, J= 7.7 Hz) 13C NMR  CDCl3 207.8, 174.6, 141.2, 136.6, 131.9, 127.1, 121.9, 120.9, 119.5, 108.5, 101.0, 66.9, 44.2, 42.8, 41.4, 38.4, 25.7, 18.0, -5.1, -5.4; IR (neat)  2920, 1710, 1460 cm-1.

# Preparation of 7. Following Method A, from 0.3 g (0.85 mmol) of 3, 0.35 g (1.02 mmol) of Co2(CO)8, 2.4 g of molecular sieves and 0.57 g (7.65 mmol) of TMANO, 0.03 g (10%) of 7 was obtained as a pale yellow solid (mp>180º dec.), and following Method B, from 0.3 g (0.85 mmol) of 3, 0.35 g (1.02 mmol) of Co2(CO)8 and 2.4 g of molecular sieves, 0.09 g (30%) of 7 was obtained.

# 1H NMR CDCl3  2.17 (dd, 1H, J1= 18.7. Hz, J2= 2.2 Hz), 2.49-2.57 (m, 1H) 2.70-2.85 (m, 2H), 3.21-3.29 (m, 1H), 4.83 (d, 1H, J= 15.4 Hz), 5.52 (d, 1H, J= 14.8 Hz), 5.84 (d, 1H, J= 11.0 Hz), 6.11 (d, 1H, J= 3.3 Hz), 7.07 (t, 1H, J= 7.7 Hz), 7.22 (t, 1H, J= 7.7 Hz), 7.38 (d, 1H, J= 8.2 Hz), 7.45 (d, 1H, J= 7.7 Hz), 7.78-7.81 (m, 2H), 7.92-7.94 (m, 2H) 13C NMR  CDCl3 206.9, 172.5, 167.5, 138.0, 136.8, 134.4, 132.1, 131.6, 127.1, 123.7, 122.0, 120.7, 120.0, 108.5, 100.3, 48.2, 44.2, 42.8, 38.4, 29.6. IR (KBr)  1780, 1710, cm-1.

# Preparation of 8. Following Method A, from 0.2 g (0.49 mmol) of 4, 0.2 g (0.58 mmol) of Co2(CO)8, 1.6 g of molecular sieves and 0.33 g (4.41 mmol) of TMANO, 0.03 g (15%) of 8 was obtained as a yellow oil, following Method B, from 0.2 g (0.49 mmol) of 4, 0.2 g (0.58 mmol) of Co2(CO)8, 1.6 g of molecular sieves, 0.08 g (40%) of 8 was obtained, and following Method C, 0.2 g (0.49 mmol) of 4, 0.2 g (0.58 mmol) of Co2(CO)8, 0.02 g (10%) of 8 was obtained.

# 1H NMR CDCl3  0.07 (s, 3H), 0.16 (s, 3H), 0.27 (s, 9H), 0.97 (s, 9H), 2.14 (dd, 1H, J1= 18.1. Hz, J2= 3.3 Hz), 2.73 (dd, 1H, J1= 18.6. Hz, J2= 7.5 Hz), 2.86 (dd, 1H, J1= 14.4. Hz, J2= 9.3 Hz) 3.15-3.17 (m, 1H), 3.45 (dd, 1H, J1= 14.4. Hz, J2= 2.1 Hz), 3.77 (dd, 1H, J1= 14.4. Hz, J2= 10.5 Hz), 4.59 (dd, 1H, J1= 13.5. Hz, J2= 3.3 Hz), 5.04 (dd, 1H, J1= 9.0. Hz, J2= 2.1 Hz), 6.50 (s, 1H), 7.11 (t, 1H, J= 7.2 Hz), 7.19 (t, 1H, J= 7.4 Hz), 7.32 (d, 1H, J= 8.1 Hz), 7.61 (d, 1H, J= 7.8 Hz) 13C NMR  CDCl3 211.1, 184.1, 143.4, 142.5, 137.0, 127.3, 121.4, 120.7, 119.7, 108.6, 99.9, 67.1, 46.8, 44.9, 42.9, 40.6, 25.7, 18.2, -0.2, -4.5, -5.1. IR (neat)  2960, 2860, 1690, cm-1.

# Preparation of 10. Following Method A, from 0.25 g (0.86 mmol) of 9, 0.35 g (1.04 mmol) of Co2(CO)8, 2.0 g of molecular sieves and 0.58 g (7.74 mmol) of TMANO, 0.22 g (80%) of 10 was obtained as a pale yellow oil, and following Method B, from 0.25 g (0.86 mmol) of 9, 0.35 g (1.04 mmol) of Co2(CO)8, 2.0 g of molecular sieves and 0.58 g (7.74 mmol) of TMANO, 0.22 g (80%) of 10 was obtained.

# 1H NMR CDCl3  -0.20 (s, 3H), 0.09 (s, 3H), 0.88 (s, 9H), 1.52 (td, 1H, J1= 13.2, J2= 1.1. Hz), 2.08 (dd, 1H, J1= 13.3 Hz, J2= 2.2 Hz), 2.46-2.55 (m, 1H), 2.75 (dd, 1H, J1= 18.7 Hz, J2= 6.6 Hz), 3.56-3.65 (m, 1H), 4.77 (d, 1H, J= 13.2 Hz), 4.94 (d, 1H, J= 13.2 Hz), 5.00 (d, 1H J= 6.0 Hz), 5.97 (d, 2H, J= 2.2 Hz), 6.06 (s, 1H), 6.55 (t, 1H, J= 2.2 Hz); 13C NMR  CDCl3 208.2, 174.9, 134.3, 132.0, 122.2, 108.7, 106.5, 66.3, 49.5, 43.0, 41.8, 38.4, 25.8, 18.0, -5.3, -5.5; IR (neat)  2920, 2860, 1710 cm-1.

# Compound 5

**Compound 6.**

**Compound 7.**

**Compund 8.**

**Compound 10.**
